# Supplementary material for: Deciphering the importance of the palindromic architecture of the immunoglobulin heavy-chain 3' regulatory region
Source: PubMed Central journal article supplement (PMC4757795; doi:10.1038/ncomms10730), 2016-02-17
Supplement: ncomms10730-s1.pdf [file ncomms10730-s1.pdf]

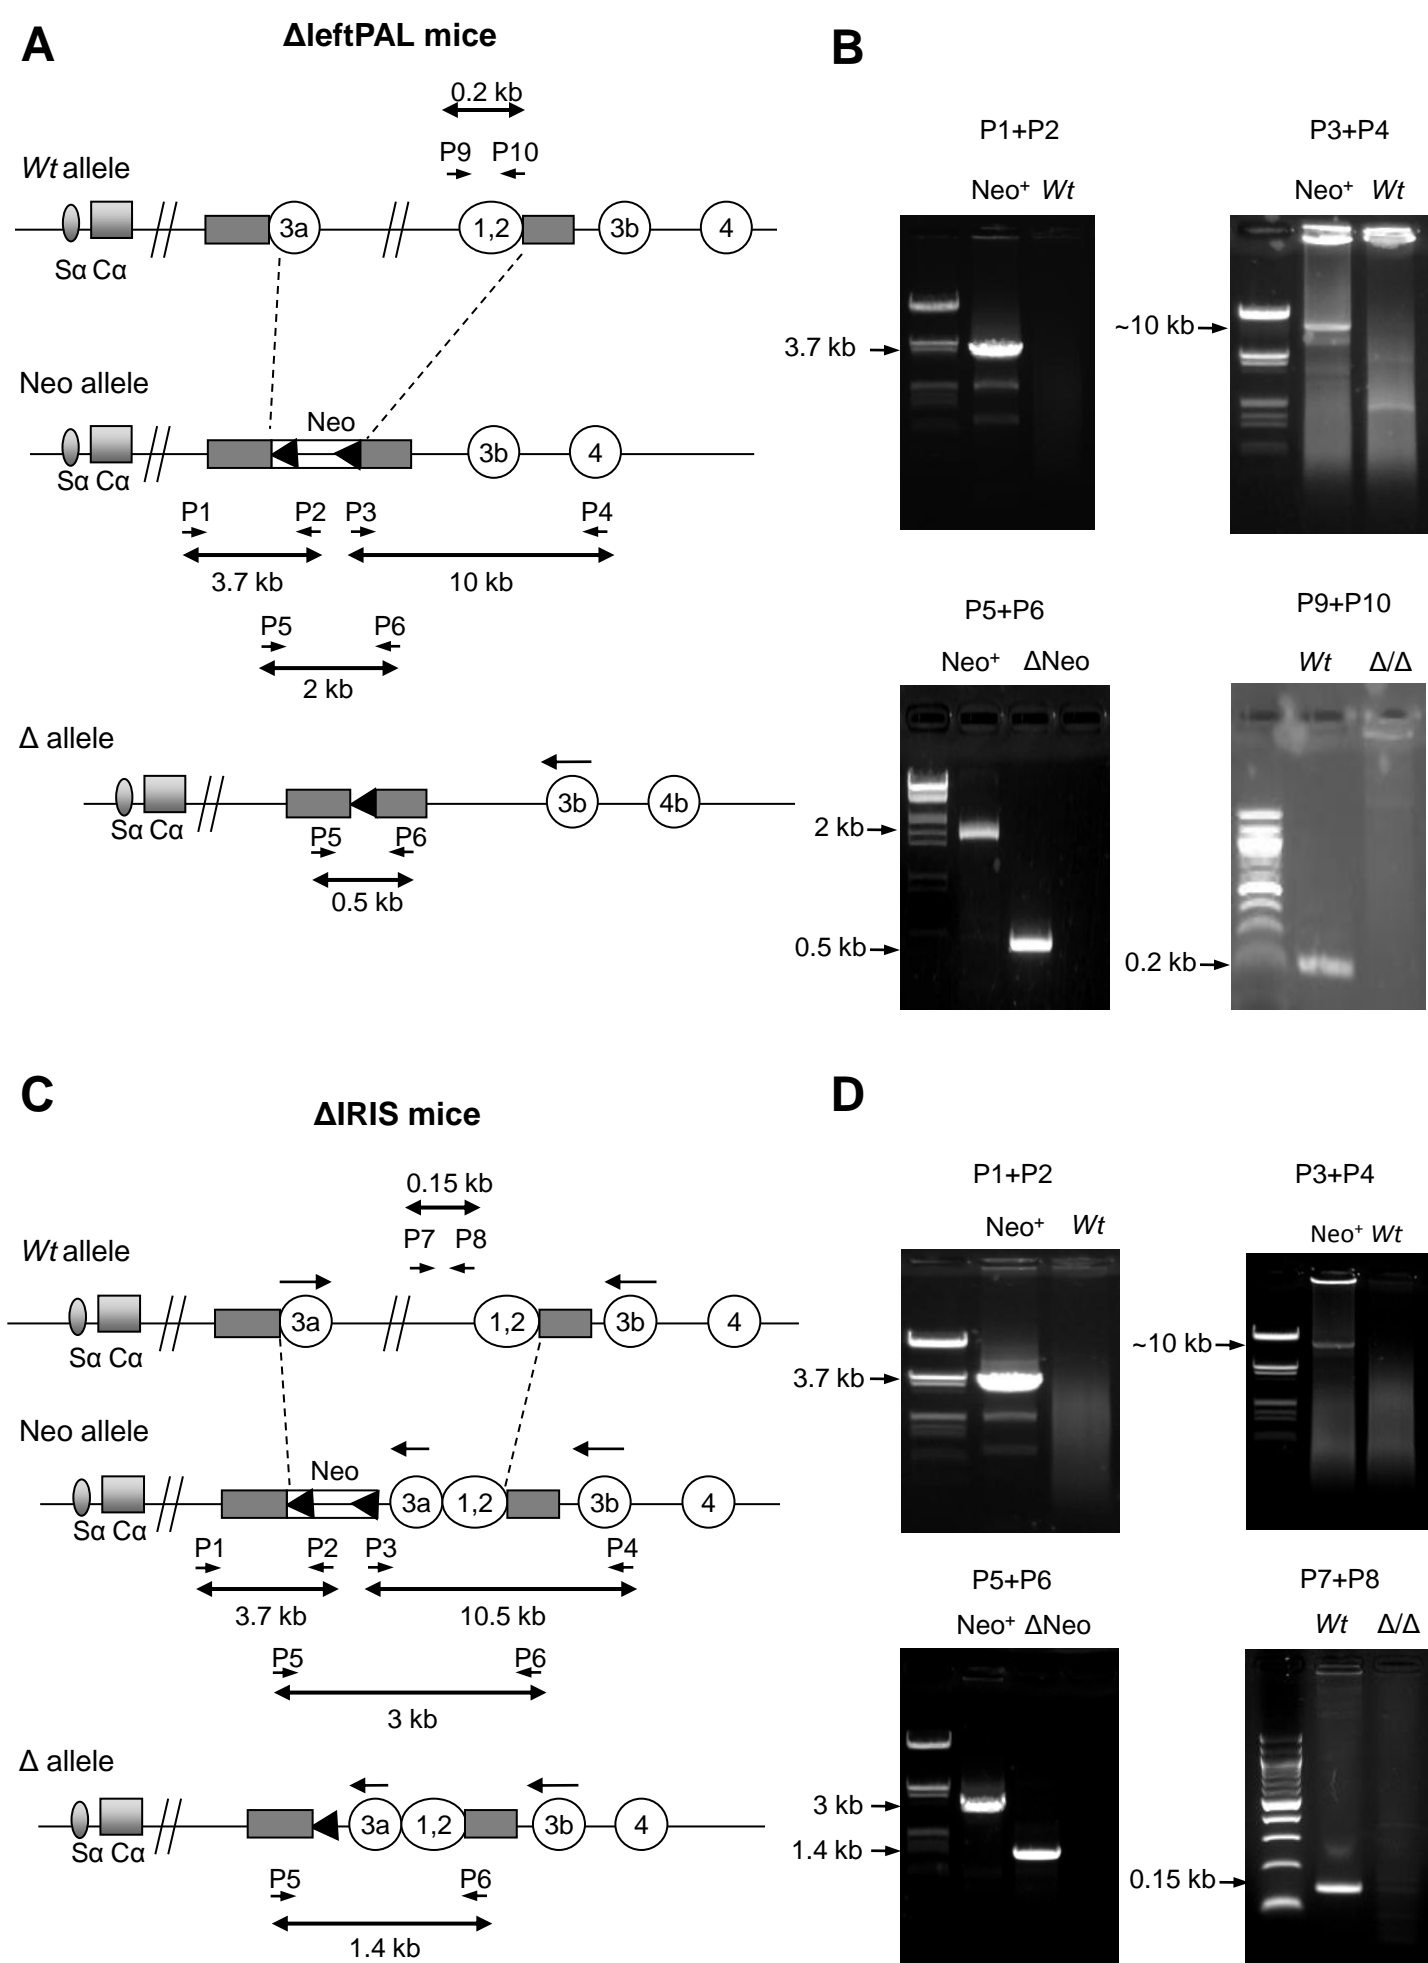

**Supplementary Figure 1**

**Supplementary Figure 1 - Generation of  $\Delta$ leftPAL and  $\Delta$ IRIS mice.** Upper part (A+B): generation of  $\Delta$ leftPAL mice. A: Gene-targeting vector was constructed in order to replace the genomic fragment encompassing the hs3a+hs1,2 part of the 3'RR with a loxP/neoR gene cassette in ES cells. Mutant ES clones allowed the derivation of Neo mutant mice. Neo mutant mice allowed the derivation of  $\Delta$ leftPAL animals after cre-deletion of the neo gene. B: A specific PCR was performed to ensure correct 5' recombination (P1+P2) (amplicon of 3.7 kb) in ES cells. A specific PCR was performed to ensure correct 3' recombination (P3+P4) (amplicon of 10 kb) in ES cells. A specific PCR was performed to ensure correct Cre recombination (P5+P6) (amplicon of 2 kb vs 0.5 kb after Cre deletion) in Neo mutant mice. A specific PCR was performed to ensure homozygous  $\Delta$ leftPAL mice (P9+P10) (lack of a 0.2 kb amplicon). Lower part (C+D): Generation of  $\Delta$ IRIS mice. C: Same protocol that in the upper part except that the loxP/neoR gene cassette reintroduced inverted hs3a and hs1,2 enhancers. D: A specific PCR was performed to ensure correct 5' recombination (P1+P2) (amplicon of 3.7 kb) in ES cells. A specific PCR was performed to ensure correct 3' recombination (P3+P4) (amplicon of 10 kb) in ES cells. A specific PCR was performed to ensure correct Cre recombination (P5+P6) (amplicon of 3 kb vs 1.4 kb after Cre deletion) in Neo mutant mice. A specific PCR was performed to ensure homozygous  $\Delta$ IRIS mice (P7+P8) (lack of a 0.15 kb amplicon).

### Screening

|     |                                              |  |
|-----|----------------------------------------------|--|
| P1  | 5'-GGA GGG AGA AAT ACC ACC-3'                |  |
| P2  | 5' AGC ACG TAC TCG GAT GGA AG 3'             |  |
| P3  | 5'GTG CAA TCC ATC TTG TTC AAT GGC CGA TCC 3' |  |
| P4  | 5' CGG CTC TAA CAA CTG GGT CCT GTA C 3'      |  |
| P5  | 5'-GGT TAA TCA GTT GGG GCT GA-3'             |  |
| P6  | 5'-AGG TGC ATG ACA GGG TAA GG-3'             |  |
| P7  | 5'-GGT GAC ATT AAG CTT GGG GAT A-3'          |  |
| P8  | 5'-CCC TGA GAG GTT TCA CAT TTT C-3'          |  |
| P9  | 5'-ACC ACT GCT GGA ATC TGA CC-3'             |  |
| P10 | 5'-CAG GCC AAG ACT TTT CCA GT-3'             |  |

### SHM analysis

|            |                                       |  |
|------------|---------------------------------------|--|
| VHJ558 SHM | 5'-CAG CCT GAC ATC TGA GGA CTC TGC-3' |  |
| SHM H4 3'  | 5'-CAG CAA CTA CCC TTT TGA GAC CGA-3' |  |

### ChIP analysis

|                     |                                               |                      |
|---------------------|-----------------------------------------------|----------------------|
| ChIP A Fw           | 5'-CAG TCT CCT CAG GTG AGT CCT-3'             | Maul et al,<br>2014  |
| ChIP A Rev          | 5'-CCC AAT GAC CCT TTC TGA CT-3'              |                      |
| ChIP B Fw           | 5'-GGA GAG CTG TCT TAG TGA TTG AGT CAA GGG-3' |                      |
| ChIP B Rev          | 5'-GTG TTC CTT TGA AAG CTG GAC-3'             |                      |
| S $\mu$ -U Fw       | 5'-TCTAAATGCGCTAAACTGAGG-3'                   | Wang et al.,<br>2009 |
| S $\mu$ -U Rev      | 5'-AGCGTAGCATAGCTGAGCTC-3'                    |                      |
| I $\gamma$ 3 Fw     | 5'-AGATCCCAAAGCTAAGCTCCTG-3'                  | Wang et al.,<br>2006 |
| I $\gamma$ 3 Rev    | 5'-CAGAGAGACCCCTCCACAGT-3'                    |                      |
| S $\gamma$ 3-U Fw   | 5'-GCTGAGAGTATGCACAGCCA-3'                    |                      |
| S $\gamma$ 3-U Rev  | 5'-GGATCATGGAACTCCTCCG-3'                     |                      |
| S $\gamma$ 3-D Fw   | 5'-CAGGCTGGGAACTCTTGGG-3'                     |                      |
| S $\gamma$ 3-D Rev  | 5'-AGTTAGTCCCCATACTTGAACC-3'                  |                      |
| I $\gamma$ 2b Fw    | 5'-TATTGTTCTGGCTGCAAATGG-3'                   | Li et al,<br>2013    |
| I $\gamma$ 2b Rev   | 5'-GTGCAGGCATATCTTCCATCC-3'                   |                      |
| S $\gamma$ 2b-U Fw  | 5'-AGCTCCAAAAGCTCAGCAGAC-3'                   |                      |
| S $\gamma$ 2b-U Rev | 5'-AGCCCCAGCTTACAAAGAGCT-3'                   |                      |
| S $\gamma$ 2b-D Fw  | 5'-GGTGGGAATATGAGGGAGAAGTCCTAG-3'             |                      |
| S $\gamma$ 2b-D Rev | 5'-TTCCACCTGCCTCAGCTCTCCACAGC-3'              |                      |

### GLT Analysis

|                                 |                                 |                     |
|---------------------------------|---------------------------------|---------------------|
| I $\mu$ -C $\mu$ -Fwd           | 5'-ACCTGGGAATGTATGGTTGTGGCTT-3' | Park et al,<br>2009 |
| I $\mu$ -C $\mu$ -Rev           | 5'-TCTGAACCTTCAAGGATGCTCTTG-3'  |                     |
| I $\gamma$ 3-C $\gamma$ 3-Fwd   | 5'-AACTACTGCTACCACCACCACCAG-3'  |                     |
| I $\gamma$ 3-C $\gamma$ 3-Rev   | 5'-ACCAAGGGATAGACAGATGGGG-3'    |                     |
| I $\gamma$ 1-C $\gamma$ 1-Fwd   | 5'-GGCCCTCCAGATCTTTGAG-3'       |                     |
| I $\gamma$ 1-C $\gamma$ 1-Rev   | 5'-ATGGAGTTAGTTTGGCAGCA-3'      |                     |
| I $\gamma$ 2b-C $\gamma$ 2b-Fwd | 5'-CCAACCAGGAAGAGTCCAGAG-3'     |                     |
| I $\gamma$ 2b-C $\gamma$ 2b-Rev | 5'-ACAGGGATCCAGAGTTCCAAGT-3'    |                     |
| I $\gamma$ 2a-C $\gamma$ 2a-Fwd | 5'-GCTGATGTACCTACCGAGAGA-3'     |                     |
| I $\gamma$ 2a-C $\gamma$ 2a-Rev | 5'-GCTGGGCCAGGTGCTCGAGGTT-3'    |                     |
| I $\alpha$ -C $\alpha$ Fw       | 5'-CTACCATAGGGAAGATAGCCT-3'     | Park et al,<br>2005 |
| I $\alpha$ -C $\alpha$ -Rev     | 5'-TAATCGTGAATCAGGCAG-3'        |                     |

**Supplementary table 1** - PCR primers used for the screening of  $\Delta$ leftPAL and  $\Delta$ IRIS mice, for real-time PCR analysis and sequencing

## Supplementary References

Li, G. et al. Combinatorial H3K9acS10ph Histone Modifications in *IgH* Locus S Regions Target 14-3-3 Adaptors and AID to Specify Antibody Class Switch DNA Recombination. *Cell Rep.* **5(3)**: 702–714. (2013)

Maul, R. et al. Spt5 accumulation at variable genes distinguishes somatic hypermutation in germinal center B cells from ex vivo-activated cells. *J. Exp. Med.* **211**:2297-2306 (2014)

Park, SR. et al. Analysis of transforming growth factor-beta1-induced Ig germ-line gamma2b transcription and its implication for IgA isotype switching. *Eur J Immunol.* **35(3)**:946-56. (2005)

Park, SR. et al. HoxC4 binds to the promoter of the cytidine deaminase AID gene to induce AID expression, class-switch DNA recombination and somatic hypermutation. *Nature Immunology* **10**, 540 - 550 (2009)

Wang, L. et al. AID-dependent histone acetylation is detected in immunoglobulin S regions. *J Exp Med.* **203(1)**:215-26. (2006)

Wang, L. et al. S region sequence, RNA polymerase II, and histone modifications create chromatin accessibility during class switch recombination. *J. Exp. Med.* **206**:1817-1830 (2009)
